# Supplementary material for: Survival and prognostic factors in patients undergoing the resection of solitary brain metastasis from non-small cell lung cancer: a retrospective cohort study
Source: PubMed Central journal article supplement — J Thorac Dis. 2022 Oct;14(10):4113–24. doi: 10.21037/jtd-22-1279 (PMC9641336; doi:10.21037/jtd-22-1279), 2022-10
Supplement: jtd-14-10-4113-dss.pdf [file jtd-14-10-4113-dss.pdf]

## Data Sharing Statement

|                     |                                                                                                                                                     |                                                                                                                                       |
|---------------------|-----------------------------------------------------------------------------------------------------------------------------------------------------|---------------------------------------------------------------------------------------------------------------------------------------|
| <b>Article Info</b> | <a href="https://dx.doi.org/10.21037/jtd-22-1279">https://dx.doi.org/10.21037/jtd-22-1279</a>                                                       |                                                                                                                                       |
| <b>Item</b>         | <b>Question</b>                                                                                                                                     | <b>Authors' Response<br/>(place "-" if not applicable)</b>                                                                            |
| 1                   | Would you like to share data collected for your study to others?                                                                                    | Yes.                                                                                                                                  |
| 2                   | If not, would you like to share the reason for your decision?                                                                                       | -                                                                                                                                     |
| 3                   | What data in particular will be shared?                                                                                                             | The survival data and the record of each variable will be shared.                                                                     |
| 4                   | Any other documents will be shared? Such as study protocol, statistical analysis plan, informed consent form, clinical study report, analytic code. | Ethical application, statistical analysis plan, and clinical study report will also be shared if requested.                           |
| 5                   | When will data availability begin?                                                                                                                  | From the publication date.                                                                                                            |
| 6                   | When will data availability end?                                                                                                                    | Two years within the publication date, since the technique or survival data may be updated over time.                                 |
| 7                   | To whom will you share the data?                                                                                                                    | Medical oncologists and lung/brain surgeons who are interested in studies of brain metastasis from NSCLC.                             |
| 8                   | For what type of analysis or purpose?                                                                                                               | For clinical study of brain metastasis from NSCLC.                                                                                    |
| 9                   | How or where can the data/documents be obtained?                                                                                                    | Emails could be sent to the address below to obtain the shared data: <a href="mailto:xuhongzhi95@sina.com">xuhongzhi95@sina.com</a> . |
| 10                  | Any other restrictions?                                                                                                                             | We may balance the potential benefits and risks for each request and then provide the data that could be shared.                      |
